# Supplementary material for: Dual-channel control of ferroelastic domains in a host–guest inclusion compound
Source: Royal Society of Chemistry journal article supplement (doi:10.1039/d2qi01824a), 2022-01-01
Supplement: d2qi01824a1.pdf [file d2qi01824a1.pdf]

## Supporting Information

### Dual-channel control of ferroelastic domains in a host-guest inclusion compound

Jun-Chao Liu,<sup>‡</sup> Fang-Fang Di,<sup>‡</sup> Yi-Piao Zeng,<sup>‡</sup> Wu-Jia Chen,<sup>†</sup> Xiao-Yun Huang, Yan-Ling Luo, Xuan Zhu, Lin Zhou\* and Yuan-Yuan Tang\*

*Ordered Matter Science Research Center, Nanchang University, Nanchang 330031, People's Republic of China. E-mail: zhoulin@ncu.edu.cn; tangyuan yuan@ncu.edu.cn.*

#### Experimental section

**Fig. S1** IR spectrum of [(3,4-DFA)(18-crown-6)][TFSA].

**Fig. S2** TGA curve of [(3,4-DFA)(18-crown-6)][TFSA]. TGA test results show that [(3,4-DFA)(18-crown-6)][TFSA] is stable until 500 K.

**Fig. S3** (a) Packing view of crystal structures of [(3,4-DFA)(18-crown-6)][PF<sub>6</sub>] at 298 K. (b) Packing view of crystal structures of [(3,4-DFA)(18-crown-6)][TFSA] at 273 K.

**Fig. S4** The experimental and simulated PXRD patterns at 273 K (a) and 323 K (b), respectively.

**Fig. S5** Structural refinement results of PXRD data for [(3,4-DFA)(18-crown-6)][TFSA] in HTP. The indexing of PXRD data reveals an orthorhombic lattice, and through the Pawley refinements, we obtained the orthorhombic point group *mmm*, among which the most possible space group is *Cmcm*. The refined cell parameters are  $a = 22.8896 \text{ \AA}$ ,  $b = 11.2260 \text{ \AA}$ ,  $c = 5.9812 \text{ \AA}$ .

**Fig. S6** The ferroelastic domains of [(3,4-DFA)(18-crown-6)][TFSA].

**Table S1** Crystal data and structure refinement for [(3,4-DFA)(18-crown-6)][TFSA].

**Table S2** Hydrogen bonds for [(3,4-DFA)(18-crown-6)][TFSA].

## Experimental section

**Synthesis Method.** All of the chemical reagents in the synthesis were of reagent grade and used without further purification. 3,4-Difluoroaniline, 18-crown-6, and bis(trifluoromethanesulfonyl)-amine were dissolved in an appropriate amount of methanol in equal stoichiometric ratios. Finally, the colorless and transparent single crystals of [(3,4-DFA)(18-crown-6)][TFSA] were obtained by slow evaporation of methanol at room temperature.

**Single-crystal X-ray crystallography.** Single-crystal X-ray diffraction data at different temperatures were measured using a Rigaku Saturn 924 diffractometer with Mo-K $\alpha$  radiation ( $\lambda = 0.71073$  Å). Data collection and structural refine were performed using Rigaku CrystalClear and SHELXTL software package. The crystal data and structure refinement are summarized in Table S1. The X-ray crystallographic structures have been deposited at the Cambridge Crystallographic Data Centre (deposition numbers CCDC: 2202555 and 2202556) and can be obtained free of charge from the CCDC via [www.ccdc.cam.ac.uk/getstructures](http://www.ccdc.cam.ac.uk/getstructures).

**Powder X-ray diffraction (PXRD).** PXRD data were measured on a Rigaku D/MAX 2000 PC X-ray diffractometer with Cu K $\alpha$  radiation at room temperature. Diffraction patterns were collected in the  $2\theta$  range of 5–50° with a step size of 0.02°.

**Thermal analyses measurements.** Differential scanning calorimetry (DSC) measurements were performed using a NETZSCH DSC 200F3 instrument. The powder samples were placed in aluminum crucibles and measured under a nitrogen atmosphere at heating and cooling rates of 20 K min<sup>-1</sup>. Thermogravimetric analyses (TGA) were carried out on a PerkinElmer TGA 8000 instrument by heating crystalline samples with a rate of 30 K min<sup>-1</sup> under a nitrogen atmosphere.

**Dielectric measurements.** The dielectric measurements were carried on a TH2828A impedance analyzer for [(3,4-DFA)(18-crown-6)][TFSA] from 500 Hz to 1 MHz. The pressed-powder pellets were deposited with silver conducting glue used as electrodes.

**Infrared (IR) spectra.** The infrared spectrum was analyzed with Bruker INVENIO, as shown in Fig. S1. The broad peak at 3656-3287 cm<sup>-1</sup> corresponds to the N–H stretching vibration. The strong peak at 3019-2885 cm<sup>-1</sup> is the aromatic ring C–H stretching vibration. The strong peak at 1354 cm<sup>-1</sup> is the absorption peak of crown ether. The strongest peak at 1231-1154 cm<sup>-1</sup> corresponds to the C–O stretching vibration, and several strong peaks at 1131-1052 cm<sup>-1</sup> are absorption peaks of [TFSA].

**Ferroelastic measurements.** The precursor solution of [(3,4-DFA)(18-crown-6)][TFSA] was prepared by dissolving 20 mg of the crystals in 400  $\mu\text{L}$ . Then, a 20  $\mu\text{L}$  precursor solution was spread on a clean indium-doped tin oxide (ITO) glass substrate. The thin films were prepared by heat treatment at 313 K for 30 min and then annealed at 343 K for 5 min. Surface morphology and ferroelastic domain observations of thin films were performed on Olympus BX53-P polarized light microscope. The stress is applied by manual pressure with the tip of a needle.

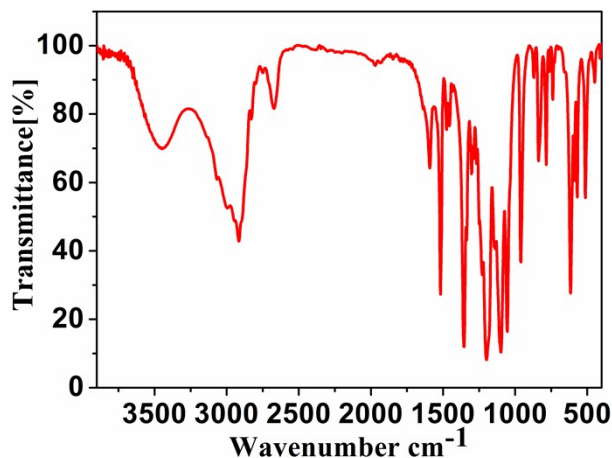

**Fig. S1** The IR spectrum of [(3,4-DFA)(18-crown-6)][TFSA] was recorded with Bruker INVENIO.

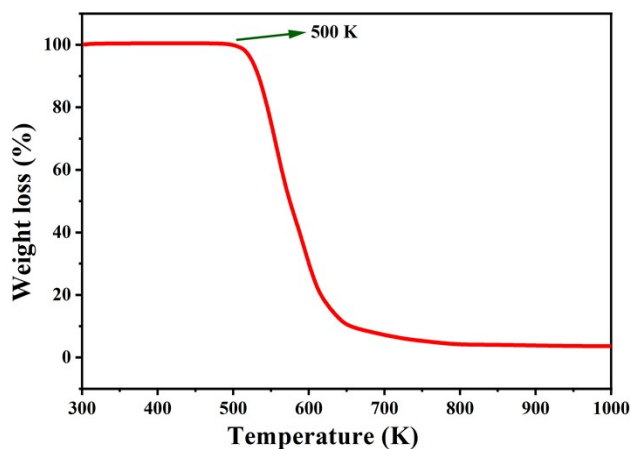

**Fig. S2** TGA curve of [(3,4-DFA)(18-crown-6)][TFSA]. TGA test results show that [(3,4-DFA)(18-crown-6)] [TFSA] is stable until 500 K.

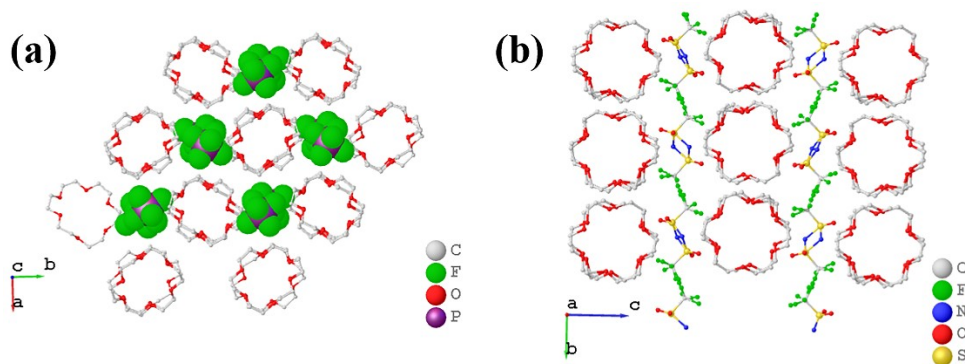

**Fig. S3** (a) Packing view of crystal structures of [(3,4-DFA)(18-crown-6)][PF<sub>6</sub>] at 298 K. (b) Packing view of crystal structures of [(3,4-DFA)(18-crown-6)][TfSA] at 273 K.

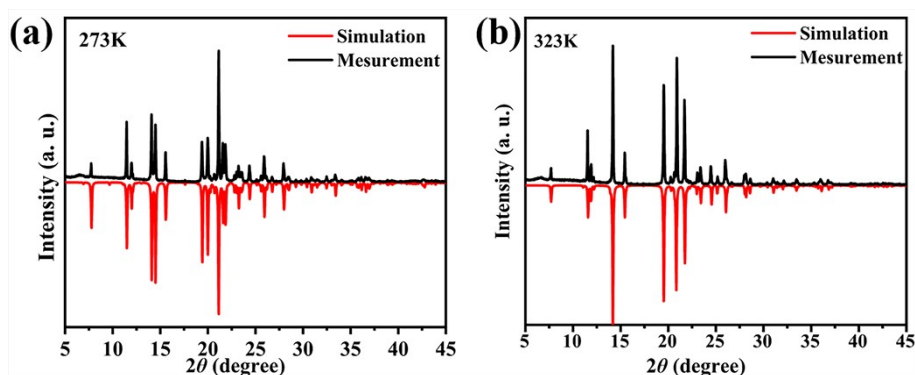

**Fig. S4** The experimental and simulated PXRD patterns at 273 K (a) and 323 K (b), respectively.

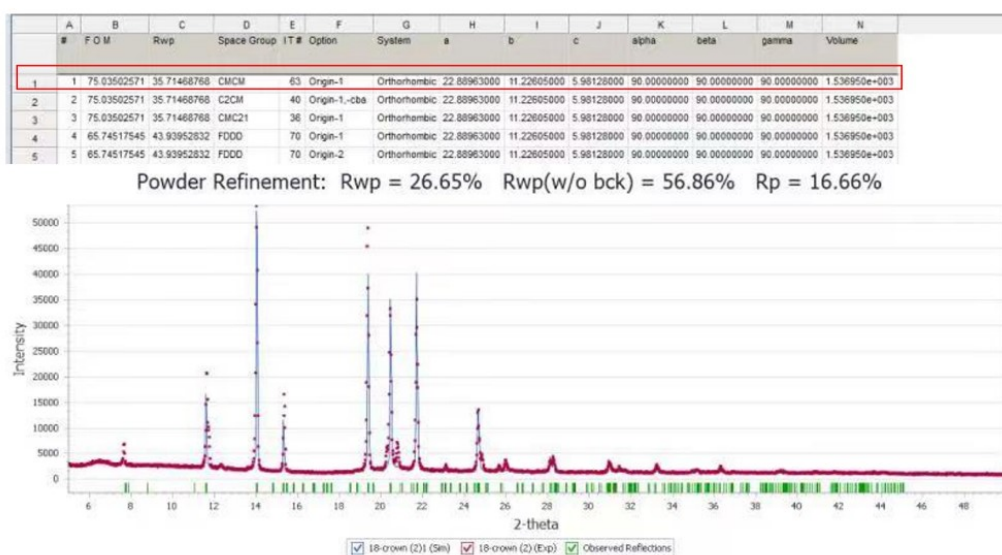

**Fig. S5** Structural refinement results of PXRD data for [(3,4-DFA)(18-crown-6)][TfSA] in HTP. The indexing of PXRD data reveals an orthorhombic lattice, and through the Pawley refinements, we obtained

the orthorhombic point group  $mmm$ , among which the most possible space group is  $Cmcm$ . The refined cell parameters are  $a = 22.8896 \text{ \AA}$ ,  $b = 11.2260 \text{ \AA}$ ,  $c = 5.9812 \text{ \AA}$ .

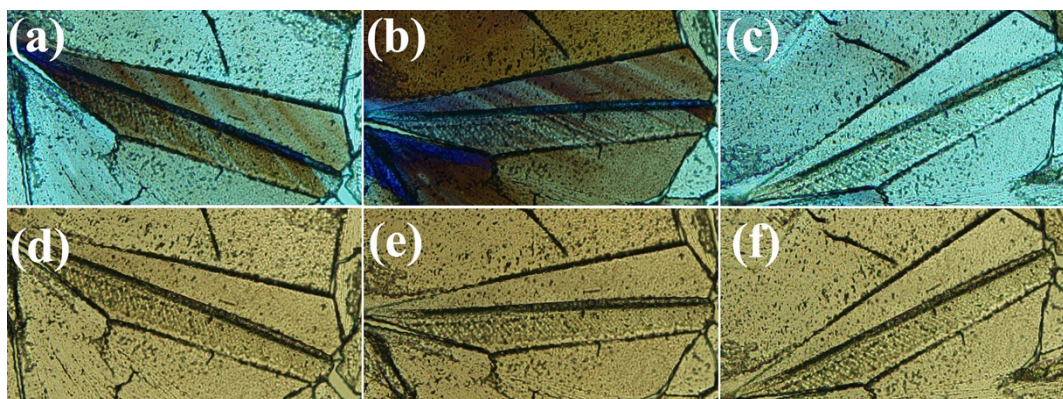

**Fig. S6** The ferroelastic domains of [(3,4-DFA)(18-crown-6)][TFSA] at 298 K.

**Table S1.** Crystal data and structure refinement for [(3,4-DFA)(18-crown-6)][TFSA].

| Compound                                     | [(3,4-DFA)(18-crown-6)][TFSA] |              |
|----------------------------------------------|-------------------------------|--------------|
| Formula                                      | $C_{20}H_{30}F_8N_2O_{10}S_2$ |              |
| Temperature                                  | 273 K                         | 323 K        |
| Formula weight                               | 674.58                        | 674.58       |
| Crystal system                               | monoclinic                    | orthorhombic |
| Space group                                  | $P2_1/n$                      | $Pnma$       |
| $a$ (Å)                                      | 8.3948(3)                     | 15.2739(8)   |
| $b$ (Å)                                      | 15.3922(6)                    | 22.9415(11)  |
| $c$ (Å)                                      | 22.7435(7)                    | 8.5182(6)    |
| $\beta$ (deg)                                | 92.020(4)                     | 90           |
| $V$ (Å <sup>3</sup> )                        | 2936.96(18)                   | 2984.8(3)    |
| $Z$ , $D_{\text{calc}}$ / g cm <sup>-3</sup> | 4, 1.526                      | 4, 1.501     |
| Goodness-of-fit on $F^2$                     | 1.082                         | 1.088        |
| $R_{\text{int}}$                             | 0.0415                        | 0.0183       |
| $R_1$ ( $> 2\sigma$ )                        | 0.1487                        | 0.1332       |
| $wR_2$ ( $> 2\sigma$ )                       | 0.2536                        | 0.1687       |

**Table S2.** Hydrogen bonds for [(3,4-DFA)(18-crown-6)][TFSA] in RTP and ITP, respectively.

|       | <b>D-H···A</b> | <b>d(D-H)/Å</b> | <b>d(H-A)/Å</b> | <b>d(D-A)/Å</b> | <b>D-H-A/°</b> |
|-------|----------------|-----------------|-----------------|-----------------|----------------|
| 273 K | N1—H1A···O2A   | 0.89            | 2.88            | 3.38(6)         | 116.8          |
|       | N1—H1A···O1A   | 0.89            | 2.01            | 2.86(5)         | 158.7          |
|       | N1—H1A···O1    | 0.89            | 1.97            | 2.847(9)        | 170.8          |
|       | N1—H1B···O5A   | 0.89            | 1.96            | 2.85(4)         | 171.2          |
|       | N1—H1B···O5    | 0.89            | 2.01            | 2.869(8)        | 162.0          |
|       | N1—H1C···O3A   | 0.89            | 1.86            | 2.75(4)         | 171.5          |
| 323 K | N1—H1A···O5    | 0.89            | 2.12            | 2.794(7)        | 131.8          |
|       | N1—H1B···O2    | 0.89            | 2.06            | 2.865(10)       | 149.0          |
